# Supplementary material for: The Freshwater Sponge Ephydatia fluviatilis Harbours Diverse Pseudomonas Species (Gammaproteobacteria, Pseudomonadales) with Broad-Spectrum Antimicrobial Activity
Source: PLoS One. 2014 Feb 12;9(2):e88429. doi: 10.1371/journal.pone.0088429 (PMC3922812; doi:10.1371/journal.pone.0088429)
Supplement: Table S2 — In vitro antagonistic activity profiles of Pseudomonas spp. isolated from Ephydatia fluviatilis . (XLSX) [file pone.0088429.s002.xlsx]

## Sheet: Sheet1
Table S2. Profile of in vitro antagonistic activities of Pseudomonas spp. isolated from Ephydatia fluviatilis
										C. stein.
Isolate Nr.	Isolate Code	BOXa	Fluorb	Biofilmc	F. mon.d	P. ult.	R. sol.	B. sub.e	C. stein.f	extract g	Closest species
82	SH-1-07	I	+	+ m	-	-	-	++++	+	+++	P. protegens
83	SH-1-08	I	+	+ m	-	-	-	++++	+	+++
84	SH-1-09	I	+	+ m	-	-	-	++++	+++	+++
85	SH-1-10	I	+	+ m	-	-	-	++++	+++	+++
87	SH-1-12	I	+	+ m	-	-	-	++++	++	+++
79	SH-1-04	II	+	-	-	-	-	-	-	n.a.	P. jessenii
80	SH-1-05	II	+	-	-	+/-	-	-	-	n.a.
108	SH-1-102	II	-	-	-	+/-	-	-	-	n.a.
109	SH-1-103	II	-	-	-	+/-	-	-	-	n.a.
76	SH-1-01	IV	+	-	-	-	+/-	-	-	n.a.	P. jessenii
78	SH-1-03	IV	+	-	-	-	-	-	-	n.a.
110	SH-1-104	IV	+	-	-	-	-	-	-	n.a.
26	SF-1-01	VI	+	+ m	-	-	-	+	++	+	P. jessenii
27	SF-1-02	VI	+	+ m	-	-	-	+	+	+
32	SF-1-07	VI	+	+ m	-	+/-	-	+	-	n.a.
34	SF-1-09	VI	+	+ m	-	-	-	+	+/-	n.a.
35	SF-2-01	VI	+	+ m	-	-	-	+	+/-	n.a.
36	SF-2-02	VI	+	+ m	++	+/-	+	++	+	+++
37	SF-2-03	VI	+	+ m	++	-	+	+	-	n.a.
39	SF-2-05	VI	+	+ m	++	-	+	+	-	n.a.
40	SF-2-06	VI	+	+ m	++	-	+	-	+/-	n.a.
43	SF-3-01	VI	+	+ m	-	-	-	-	-	n.a.
44	SF-3-02	VI	+	+ m	++	-	-	+	-	n.a.
45	SF-3-03	VI	+	+/- f	-	-	+	++	+	+++
46	SF-3-04	VI	+	+ m	-	-	-	-	+/-	n.a.
47	SF-3-05	VI	+	+ m	-	-	+++	+	+	++
48	SF-3-06	VI	+	+ m	++	+/-	-	-	-	n.a.
103	SF-1-101	VI	+	+ m	-	-	-	++	-	n.a.
104	SF-1-102	VI	+	+ m	-	-	-	++	+	+
77	SH-1-02	IX	+	-	-	-	-	+	-	n.a.	P. jessenii
97	SH-2-05	IX	+	-	-	-	-	++	+	+/-
98	SH-2-06	IX	+	-	-	-	-	-	-	n.a.
99	SH-2-07	IX	+	-	-	-	-	-	-	n.a.
100	SH-2-08	IX	+	-	-	+/-	-	-	-	n.a.
8	SE-1-08	XI	+	+/- ?	-	+/-	-	+	-	n.a.	P. jessenii
11	SE-1-11	XI	+	+ m	-	+	+/-	++	-	n.a.
10	SE-1-10	XIV	+	-	-	-	-	-	-	n.a.	P. jessenii
12	SE-1-12	XIV	+	-	-	+/-	+/-	-	-	n.a.
93	SH-2-01	XV	+	-	-	-	-	++	+++	+++	P. jessenii
94	SH-2-02	XV	+	+ f	-	-	-	-	+	+
9	SE-1-09	S	+	+ f	-	-	-	-	-	n.a.	P. jessenii
19	SE-2-02	S	+	-	-	-	-	-	-	n.a.
22	SE-2-05	S	+	-	-	-	-	-	-	n.a.
58	SG-1-08	S	+	-	-	-	-	-	-	n.a.
106	SG-1-102	S	-	-	-	+/-	-	-	-	n.a.
1	SE-1-01	III	+	+ mf	-	+/-	-	+	+/-	n.a.	P. reinekei
4	SE-1-04	III	+	+ f	-	+	-	+	-	n.a.
14	SE-1-14	III	+	-	-	-	-	-	-	n.a.
17	SE-1-17	III	+	+ mf	-	+/-	-	-	+/-	+/-
20	SE-2-03	III	+	+ m	-	-	+++	-	-	n.a.
101	SE-1-101	III	+	+ m	-	+/-	-	+++	+	+/-
102	SE-1-102	III	+	+ m	-	+/-	-	++	-	n.a.
53	SG-1-03	S	+	-	-	-	-	-	-	n.a.	P. reinekei
24	SE-2-07	V	+	+ m	-	+++	+++	-	-	n.a.	P. koreensis
51	SG-1-01	V	+	+/- m	-	-	-	-	-	n.a.
67	SG-1-17	V	+	+/- f	-	-	-	-	-	n.a.
5	SE-1-05	VII	-	+ m	-	+/-	-	+	-	n.a.	P. migulae
86	SH-1-11	VII	+	-	-	+/-	-	-	-	n.a.
64	SG-1-14	VII	+	-	-	-	-	+	-	n.a.
57	SG-1-07	VIII	-	-	-	-	-	+	-	n.a.	P. migulae
61	SG-1-11	VIII	+	-	-	-	-	+	-	n.a.
63	SG-1-13	VIII	+	-	-	-	-	++	-	n.a.
70	SG-2-03	VIII	-	-	-	-	-	++	-	n.a.
15	SE-1-15	S	-	-	-	-	-	-	-	n.a.	P. migulae
56	SG-1-06	S	+	+ m	-	-	+	+	-	n.a.
60	SG-1-10	X	+	+ m	-	-	-	+	+/-	+	P. umsongensis
72	SG-2-05	X	+	+ m	-	+/-	-	+	-	n.a.
74	SG-2-07	X	+	+ m	-	-	-	+	+/-	n.a.
88	SH-1-13	X	+	+ m	-	+/-	-	-	+/-	n.a.
92	SH-1-17	X	+	+/- m	-	-	-	+	+++	+++
73	SG-2-06	XIII	+	+ m	-	-	-	-	+/-	n.a.	P. umsongensis
75	SG-2-08	XIII	+	-	-	-	-	+	-	n.a.
55	SG-1-05	S	+	+/- m	-	+/-	-	-	+/-	n.a.	P. umsongensis
65	SG-1-15	S	+	+ m	-	-	-	-	-	n.a.
68	SG-2-01	S	+	-	-	++	+	-	-	n.a.
69	SG-2-02	S	+	+/- f	-	+	-	-	-	n.a.
91	SH-1-16	S	+	+/- m	-	+/-	-	+	+	n.a.
96	SH-2-04	S	+	+ m	-	+/-	-	-	-	n.a.
18	SE-2-01	XII	+	-	-	-	-	-	-	n.a.	P. monteilli
66	SG-1-16	XII	+	-	-	-	-	-	-	n.a.
2	SE-1-02	S	+	-	-	+/-	+/-	+	+/-	n.a.	P. mandelii
52	SG-1-02	S	+	-	-	+/-	-	-	+++	++
54	SG-1-04	S	+	-	-	-	-	-	-	n.a.
81	SH-1-06	S	+	+ f	-	+/-	-	-	+++	++
95	SH-2-03	S	+	-	-	-	-	++	-	n.a.
13	SE-1-13	S	-	-	++	+	+/-	-	-	n.a.
3	SE-1-03	S	+	-	-	-	-	+	+/-	n.a.	P. oryzihabitans
50	SF-3-08	S	+	+ m	-	-	-	-	-	n.a.	P. cedrina
105	SG-1-101	S	+	+/- f	-	+/-	-	-	-	n.a.
62	SG-1-12	S	+	+ f	-	-	-	+	-	n.a.	P. brenneri
a BOX-PCR fingerprints as determined in Figure 2.
b Upon isolation, fluorescence was observed visually under UV light. Results shown in table refer to excitation and emission fluorescence peaks measured using a fluorometer at 400 and 460 nm, respectively, which are characteristic of the common siderophore pyoverdin.
c biofim formation in static liquid microcosms; m = mucilaginous-type biofilm; f = flocculent-type biofilm; mf = both types of biofilms could be observed in the different replicates.
d Antagonism towards the fungi Fusarium moniliforme (F. mon.) and Rhizoctonia solani AG3 (R. sol.) and the oomycete Pythium ultimum (P. ult.). – indicates no zone of inhibition
and model organism overgrows bacteria; +/- represents no overgrowth of Pseudomonas isolates by the model organism, but no zone of inhibition; + represents 1mm wide zone of inhibition; ++
represents 2 mm wide zone of inhibition; +++ represents ≥ 3 mm wide zone of inhibition.
eAntagonism towards the Gram-positive bacterium Bacillus subtilis F6 (B. sub.). - indicates no zone of inhibition; + represents 1 mm wide zone of inhibition; ++ represents 2
mm wide zone of inhibition; +++ represents between 2 and 5 mm wide zone of inhibition; ++++ represents > 5 mm wide zone of inhibition.
f Resistance of Pseudomonas isolates to predation by the ciliate Colpoda steinii (C. stein). - indicates > 50% depletion; +/- represents until 50% depletion; + represents until 40% depletion; ++
represents until 30% depletion; +++ represents less than 20% depletion from the initial bacterial inoculum in predation assays.
g Cytotoxic potential of cell extracts from Pseudomonas isolates towards Colpoda steinii. - indicates all C. steinii cells were mobile; +/- represents more than 50% were mobile; +, 50% slow mobile
cells, ++ 100% slow-mobile cells, +++ >50% immobile or lysed cells compared to control, respectively. n.d. not determined.
